# Supplementary material for: B cell Sirt1 deacetylates histone and non-histone proteins for epigenetic modulation of AID expression and the antibody response
Source: PubMed Central journal article supplement — Sci Adv. 2020 Apr 1;6(14):eaay2793. doi: 10.1126/sciadv.aay2793 (PMC7112761; doi:10.1126/sciadv.aay2793), 2020-04-01
Supplement: aay2793_SM.pdf [file aay2793_SM.pdf]

[advances.sciencemag.org/cgi/content/full/6/14/eaay2793/DC1](https://advances.sciencemag.org/cgi/content/full/6/14/eaay2793/DC1)

## Supplementary Materials for

### **B cell Sirt1 deacetylates histone and non-histone proteins for epigenetic modulation of AID expression and the antibody response**

Huoqun Gan, Tian Shen, Daniel P. Chupp, Julia R. Taylor, Helia N. Sanchez,  
Xin Li, Zhenming Xu, Hong Zan\*, Paolo Casali\*

\*Corresponding author. Email: [zan@uthscsa.edu](mailto:zan@uthscsa.edu) (H.Z.); [pcasali@uthscsa.edu](mailto:pcasali@uthscsa.edu) (P.C.)

Published 1 April 2020, *Sci. Adv.* **6**, eaay2793 (2020)  
DOI: 10.1126/sciadv.aay2793

#### **This PDF file includes:**

Fig. S1 to S10  
Table S1

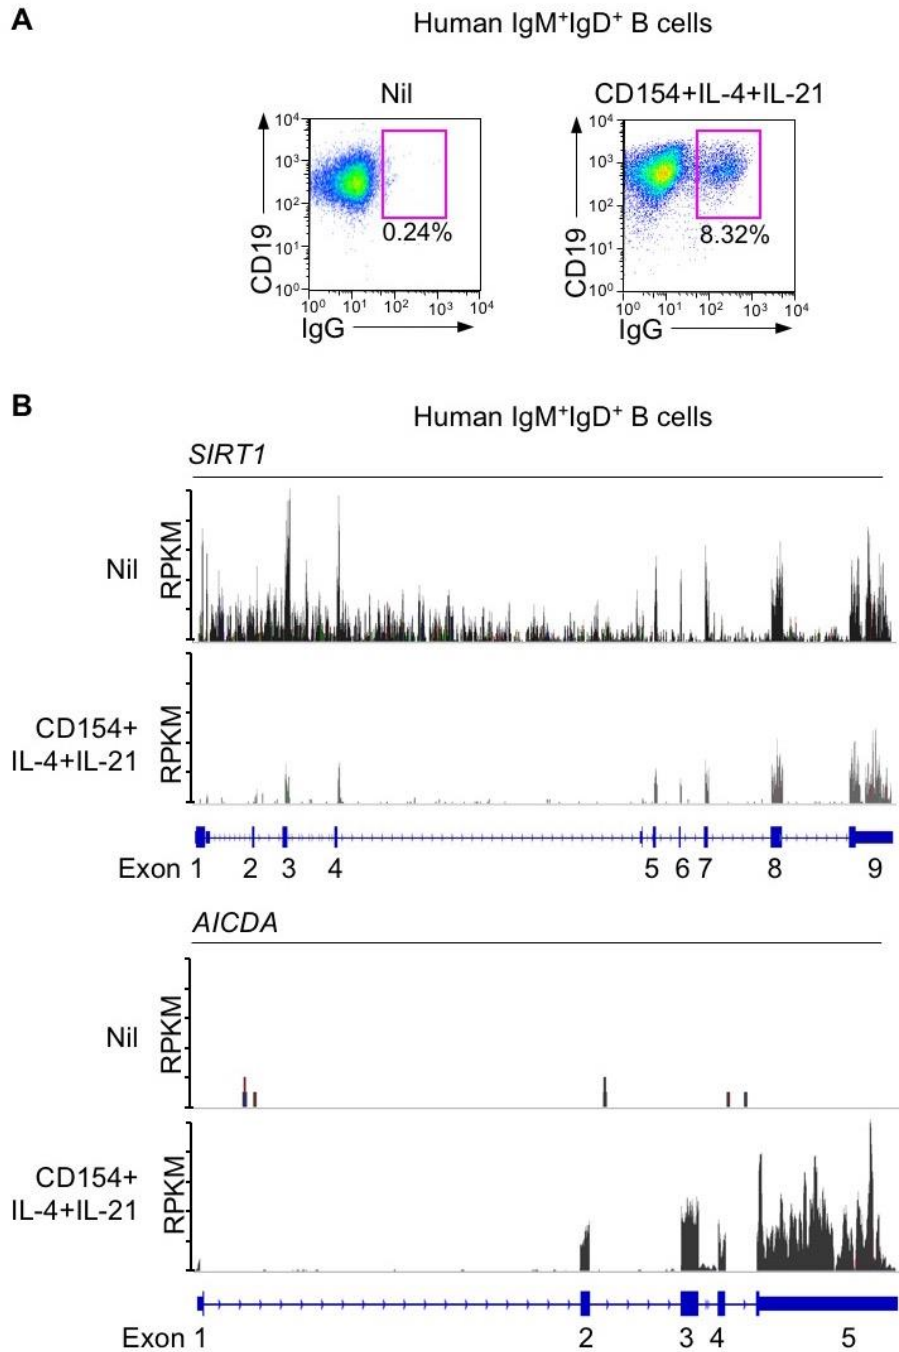

**Fig. S1. Human B cells undergoing CSR downregulate *SIRT1* and upregulate *AICDA*.** (A) Surface expression of CD19 and IgG on unstimulated human IgM<sup>+</sup>IgD<sup>+</sup> naïve B cells (Nil) or similar B cells stimulated with CD154 plus IL-4 and IL-21 for 120 hours, as analyzed by flow cytometry. (B) Profile of RNA-Seq reads (RPKM) at the *SIRT1* and *AICDA* loci in unstimulated human IgM<sup>+</sup>IgD<sup>+</sup> naïve B cells or similar B cells stimulated with CD154 plus IL-4 and IL-21 for 72 hours. Data are from one experiment.

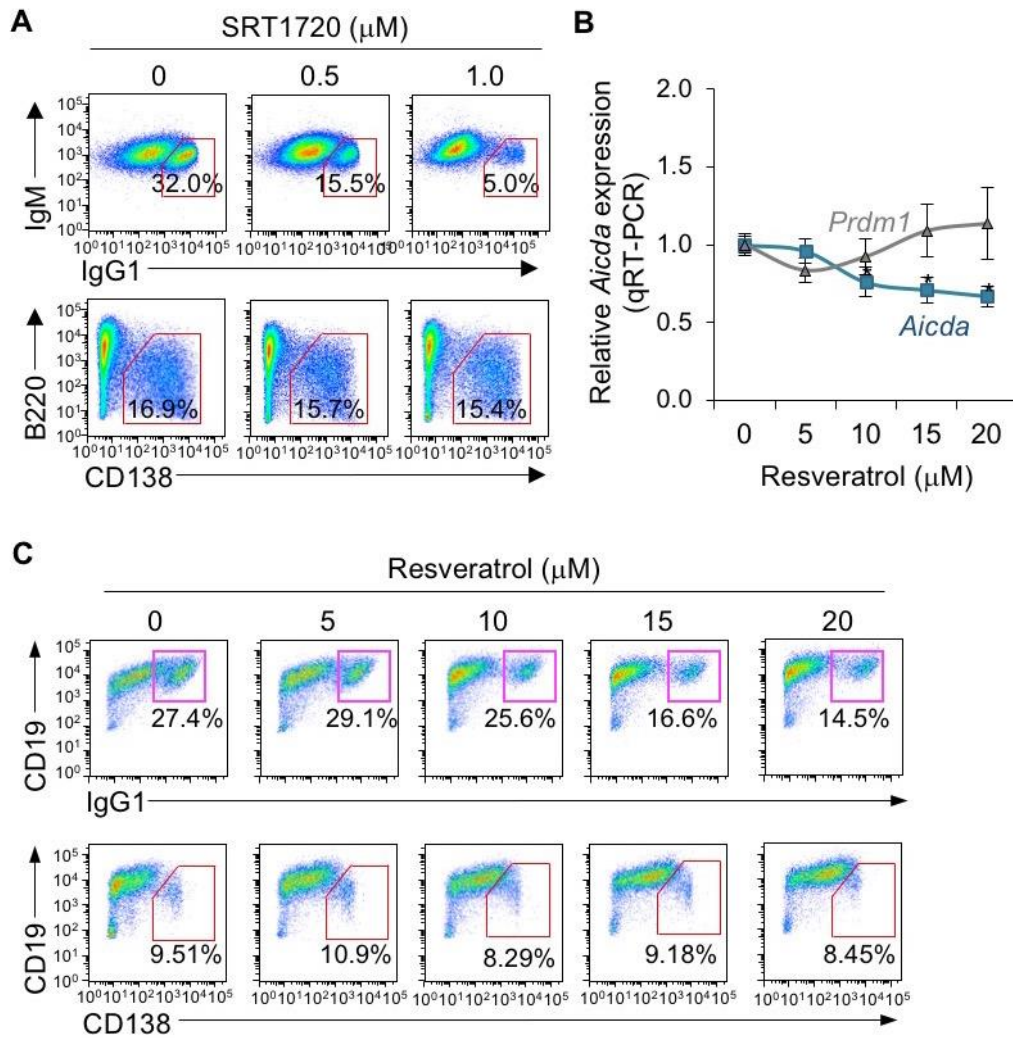

**Fig. S2. Sirt1 activators dampen *Aicda* expression and CSR but not plasma cell differentiation.** B cells isolated from WT C57BL/6 mice were stimulated with LPS plus IL-4 with nil or increasing doses of SRT1720 (A) or resveratrol (B,C). (A) Surface expression of IgM, IgG1, B220 and CD138 after 96-hour culture, as analyzed by flow cytometry. Data are representative of three independent experiments yielding comparable results. (B) Expression of *Aicda* and *Prdm1*, as analyzed by qRT-PCR and normalized to  $\beta$ -*Actin* expression after 72-hour culture. Data are means  $\pm$  SEM of three biological independent experiments, each consisting of triplicates. \* $P < 0.05$ , paired two-tailed Student's *t*-test. (C) Surface expression of IgG1, CD19 and CD138 after 96-hour culture, as analyzed by flow cytometry. Data are representative of three independent experiments yielding comparable results.

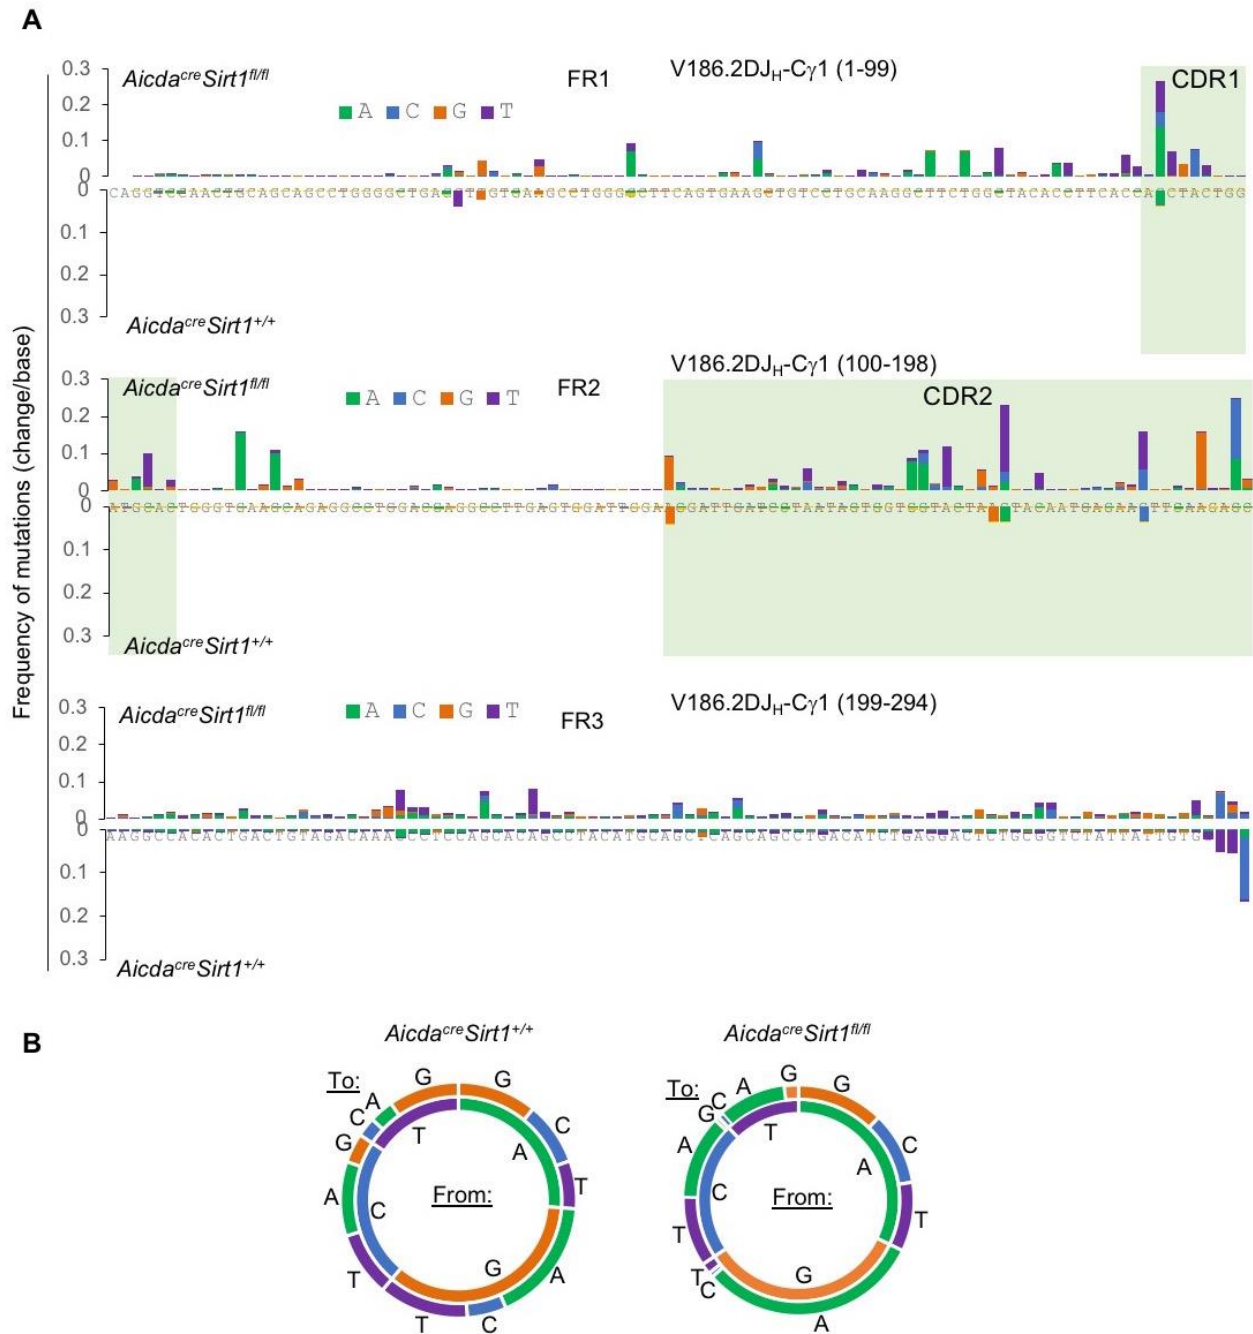

**Fig. S3. Increased somatic mutations in *Aicda<sup>cre</sup>Sirt1<sup>fl/fl</sup>* mice.** *Aicda<sup>cre</sup>Sirt1<sup>+/+</sup>* and *Aicda<sup>cre</sup>Sirt1<sup>fl/fl</sup>* mice were injected with NP<sub>16</sub>-CGG (i.p.) at days 0 and 21. Somatic point mutations in the V<sub>186.2</sub> region of V<sub>186.2</sub>DJ<sub>H</sub>-C $\gamma$ 1 transcripts amplified from spleen B cells 7 days after the second NP-CGG injection were analyzed by MiSeq amplicon sequencing. (A) Distribution of point-mutations in V<sub>186.2</sub> region. (B) Spectrum of point-mutations. Data were pooled from two *Aicda<sup>cre</sup>Sirt1<sup>+/+</sup>* and two *Aicda<sup>cre</sup>Sirt1<sup>fl/fl</sup>* mice, each including more than 5,000 sequences.

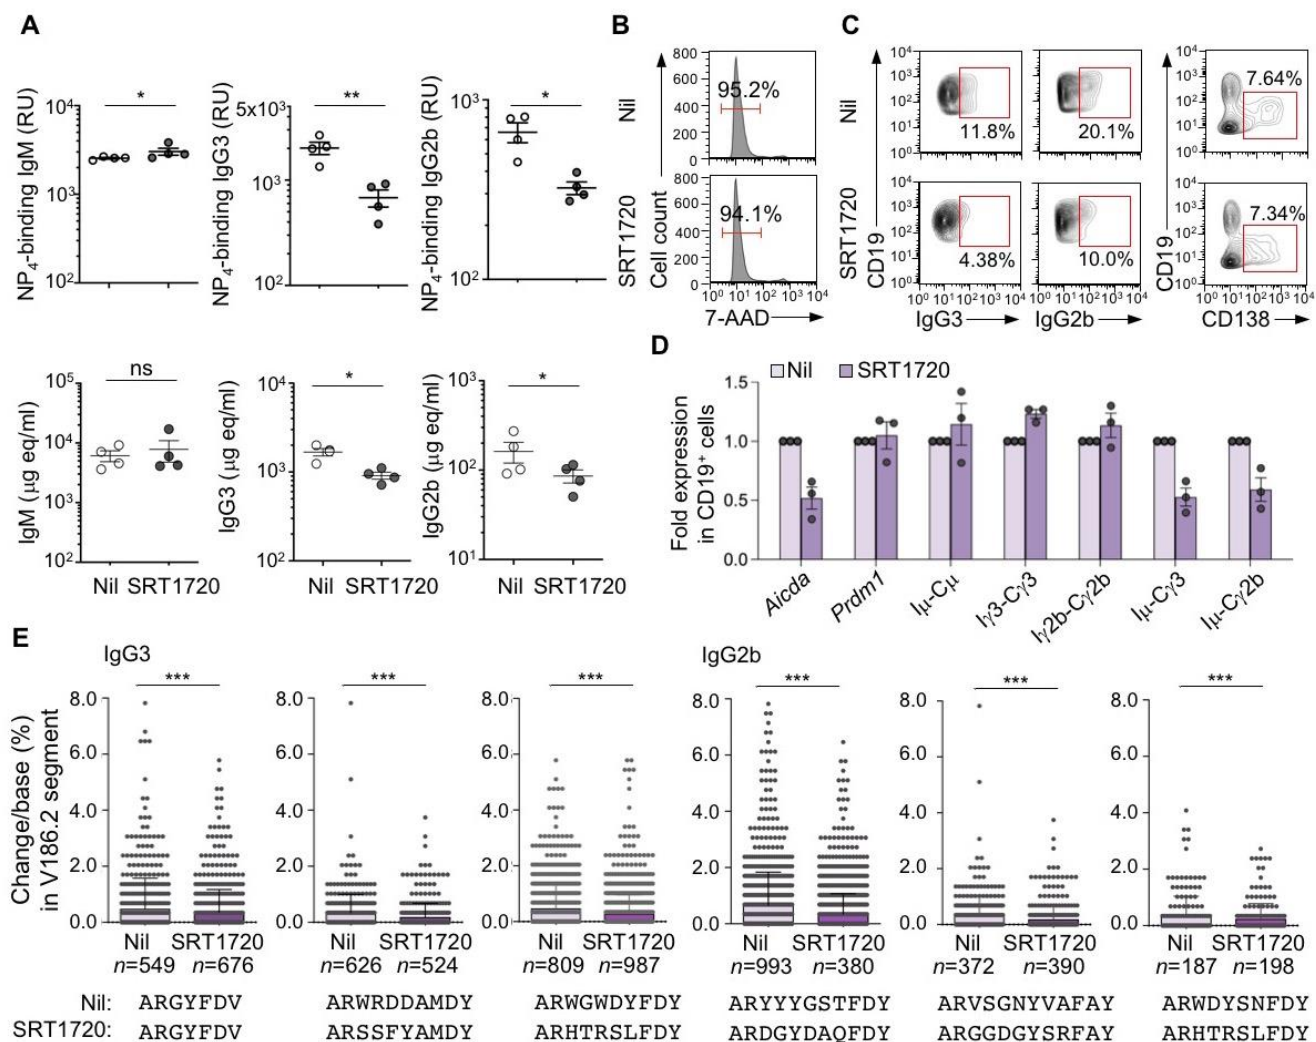

**Fig. S4. Sirt1 activation dampens the class-switched/hypermutated T-independent antibody response in a B cell-intrinsic fashion.** The NBSGW/B mice were injected (i.p.) with SRT1720 (0.3 mg in 200 ml PBS,  $n = 4$ ) or PBS only (Nil,  $n = 4$ ) once every two days. These mice were then i.p. injected with NP<sub>0.5</sub>-LPS (50 μg in 200 ml PBS) at days 0, 2, 4 and 6, and sacrificed 7 d after the last NP<sub>0.5</sub>-LPS injection. **(A)** Serum titers of total and NP<sub>4</sub>-binding IgM, IgG3 and IgG2b as measured by ELISA (means ± SEM). **(B and C)** Viable (7-AAD<sup>-</sup>) spleen CD19<sup>+</sup> B cells **(B)** as well as CSR and plasma cell differentiation **(C)** as analyzed by flow cytometry. Data are from mice representative of each group. **(D)** qRT-PCR analysis of gene expression, as indicated. Values were normalized to the expression of *Gapdh* and depicted as ratios to expression in nil-treated mice (means ± SEM of values from 4 mice, each consisting of triplicates). **(E)** Somatic point-mutations in the V<sub>186.2</sub> region of V<sub>186.2</sub>DJ<sub>H</sub>-C<sub>γ</sub>2b and V<sub>186.2</sub>DJ<sub>H</sub>-C<sub>γ</sub>3 cDNA clones from three pairs of mice treated with nil or SRT1720. The frequency of mutations in different NBSGW/B mice were compared by enumerating the point-mutations in the V<sub>186.2</sub> segment of three “comparable” V<sub>186.2</sub>DJ<sub>H</sub>-C<sub>γ</sub>3 and V<sub>186.2</sub>DJ<sub>H</sub>-C<sub>γ</sub>2b clone pairs (each pair consisting of a mouse treated with nil and one with SRT1720). Comparable pairs were defined as B cell clones expressing V<sub>186.2</sub>DJ<sub>H</sub>-C<sub>γ</sub>3 or V<sub>186.2</sub>DJ<sub>H</sub>-C<sub>γ</sub>2b with IgH CDR3s being identical in length (7 to 12 amino acids), identical in the first two amino acids and identical in the last three or four amino acids. One of the three V<sub>186.2</sub>DJ<sub>H</sub>-C<sub>γ</sub>3 clone pairs was in fact identical in the whole IgH CDR3 sequence (ARGYFDY). Each dot represents an individual sequence. The number of sequences analyzed from each clone is indicated below the dot plots. \* $P < 0.05$ , \*\* $P < 0.01$ , \*\*\* $P < 0.001$ , unpaired two-tailed Student's *t*-test.



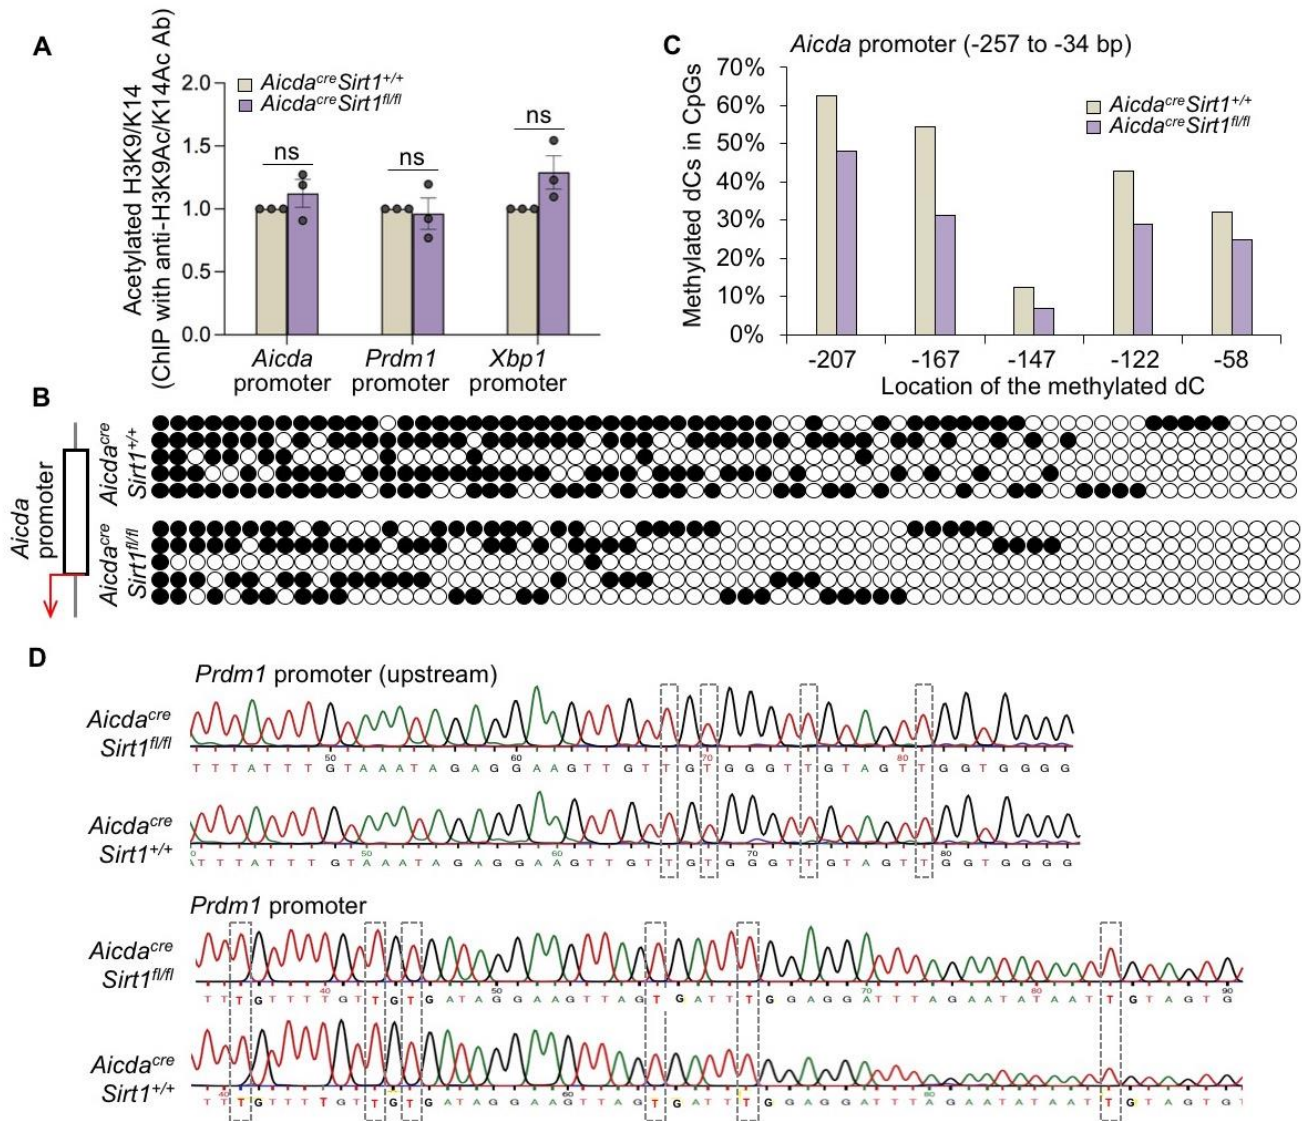

**Fig. S5. *Aicda<sup>cre</sup>Sirt1<sup>fl/fl</sup>* B cells display altered DNA methylation in *Aicda* promoter but not DNA methylation in *Prdm1* promoter and Acetylated H3K9/K14 in *Aicda*, *Prdm1* or *Xbp1* promoter.** *Aicda<sup>cre</sup>Sirt1<sup>+/+</sup>* and *Aicda<sup>cre</sup>Sirt1<sup>fl/fl</sup>* B cells stimulated with LPS plus IL-4 for 72 hours. **(A)** Acetylated H3K9/K14 in *Aicda*, *Prdm1* or *Xbp1* promoter were analyzed by ChIP using a rabbit anti-H3K9Ac/K14Ac Ab followed by qPCR. Data are means  $\pm$  SEM of three biological independent experiments, each consisting of triplicates. ns, not significant, paired two-tailed Student's *t*-test. **(B)** CpG DNA methylation of *Aicda* promoter DNA as analyzed by bisulfite sequencing. Upon treatment with bisulfite, unmethylated dC nucleotides are converted to dU (read as dT in DNA sequence), whereas methylated dC are not. Methylation patterns at each dCs within CpG motifs are indicated by circles: ●, methylated dCs; ○, unmethylated dCs. Each row is a unique sequence, and each dC is represented by a column of circles. **(C)** Proportion of methylated dC nucleotides within CpG motifs. Pooled data from B cells derived from two *Aicda<sup>cre</sup>Sirt1<sup>+/+</sup>* and two *Aicda<sup>cre</sup>Sirt1<sup>fl/fl</sup>* mice; each data cluster included more than 5,000 sequences. **(D)** CpG DNA methylation of the *Prdm1* promoter, as analyzed by bisulfite sequencing. Depicted are DNA sequences of PCR products of bisulfite-treated genomic DNA. The sequence signal from dCs in CpG motifs is outlined. Because unmethylated dC nucleotides can be converted to dU (read as dT in DNA sequence), whereas methylated dC cannot, the ratio of the dC (blue)/dT (red) signal provides an index of dC methylation at any given positions. Data are representative of three independent experiments yielding comparable results.

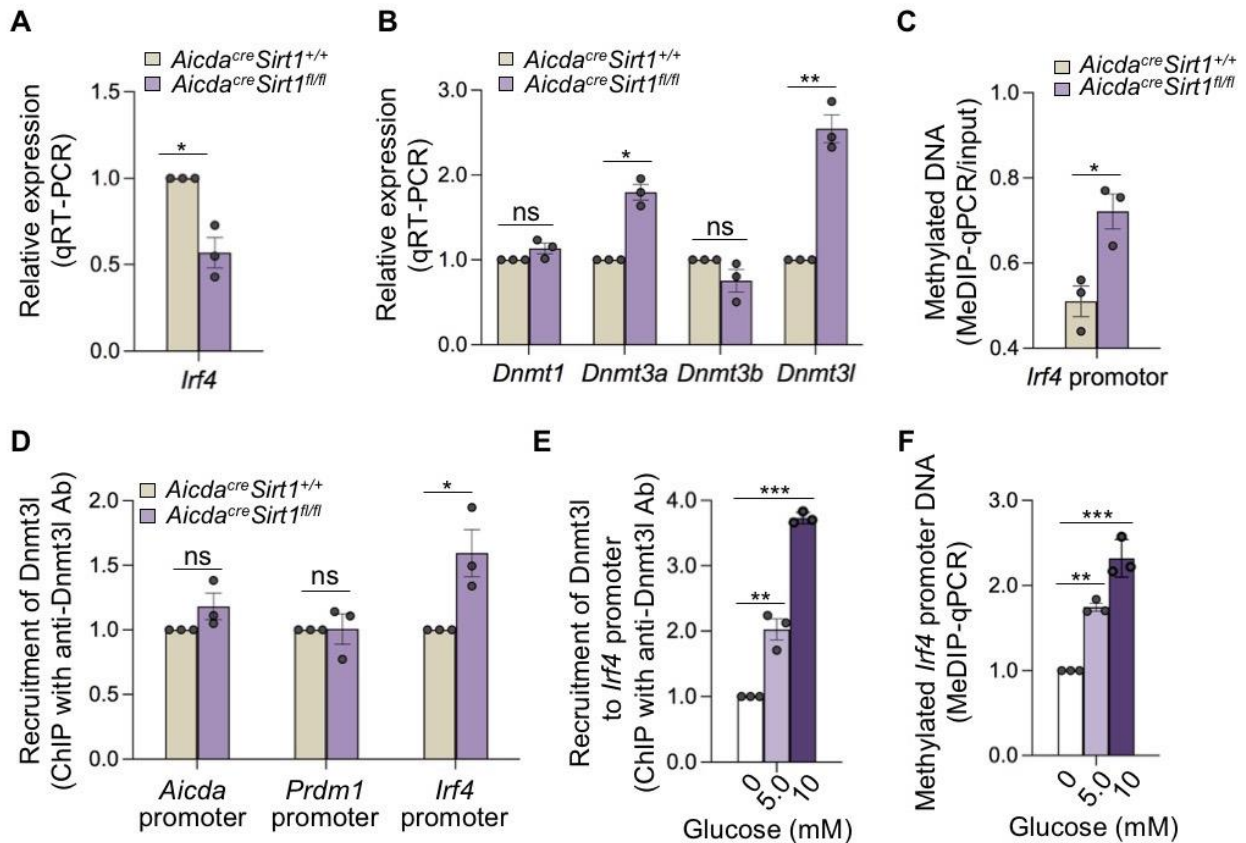

**Fig. S6. *Aicda<sup>cre</sup>Sirt1<sup>fl/fl</sup>* B cells stimulated to undergo CSR and plasma cell differentiation increase *Dnmt3l* expression and *Dnmt3l* recruitment to the *Irf4* promoter.** (A) Expression of *Irf4* in *Aicda<sup>cre</sup>Sirt1<sup>+/+</sup>* and *Aicda<sup>cre</sup>Sirt1<sup>fl/fl</sup>* B cells stimulated with LPS plus IL-4 for 72 hours. (B) Expression of *Dnmt1*, *Dnmt3a*, *Dnmt3b* and *Dnmt3l* transcripts were analyzed by qRT-PCR and normalized to  $\beta$ -Actin expression. (C) Increased DNA methylation of *Irf4* promoter in and *Aicda<sup>cre</sup>Sirt1<sup>fl/fl</sup>* B cells. (D) Recruitment of *Dnmt3l* to the *Aicda*, *Prdm1* or *Irf4* promoter, as detected by ChIP assays using anti-Dnmt3l, followed by qPCR. (E and F) C57BL/6 mouse B cells were cultured in glucose-free medium supplied with 0, 5.0, or 10 mM of glucose and stimulated with LPS plus IL-4 for 72 hours (E). DNA methylation of the *Irf4* promoter, as analyzed by MeDIP-qPCR (F). Data in A to F are means  $\pm$  SEM of three biological independent experiments. \* $P < 0.05$ , \*\* $P < 0.01$ , \*\*\* $P < 0.001$ ; ns, not significant, paired two-tailed Student's *t*-test.

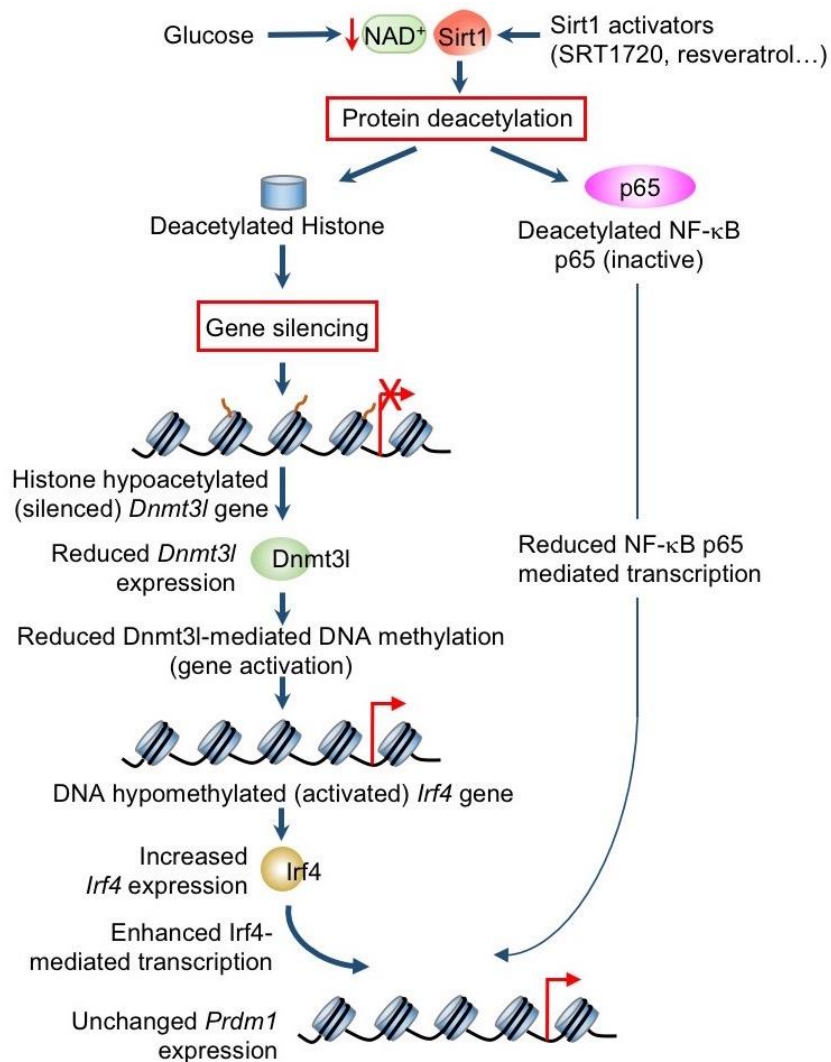

**Fig. S7. Sirt1 increases expression of *Irf4*, a positive regulator of *Prdm1*, by reducing *Dnmt3l* expression and *Dnmt3l*-mediated DNA methylation of the *Irf4* gene, thereby nullified a potential *Prdm1* upregulation brought about by increased p65 acetylation.** As shown in Fig. 4I, in *Aicda<sup>cre</sup>Sirt1<sup>fl/fl</sup>* B cells stimulated by LPS or CD154 plus IL-4, increased NF-κB p65 acetylation resulted in increased recruitment of p65-Ac to the *Aicda* promoter (by up to 8.7 folds, as shown by ChIP with an anti-p65-Ac mAb), further increasing *Aicda* expression. p65 acetylation also resulted in some recruitment of p65-Ac to the *Prdm1* promoter (by less than two folds). This was not, however, associated with upregulated *Prdm1* expression (Fig. 2M). This was possibly due to decreased *Irf4*, which positively regulates *Prdm1* expression by targeting *Prdm1* regulatory region (Sciammas et al., *Immunity*, 25:225–236, 2006). *Irf4* expression is negatively controlled by DNA methylation of its promoter (Ortmann et al., *Nucleic Acids Res.* 33:6895-6905, 2005), which, as suggested by our experiments, can be effected by the DNA methyltransferase *Dnmt3l* (fig. S6). Sirt1 can downregulate the expression of *Dnmt3l* by histone deacetylation of the *Dnmt3l* promoter (Heo et al., *Cell Rep.*, 18:1930-1945, 2017). *Dnmt3l* can be recruited to the promoter of *Irf4* and modulate *Irf4* DNA methylation and expression. B cell-specific *Sirt1* deletion or metabolic Sirt1 inactivation by higher glucose concentration resulting in increased *Dnmt3l* expression and *Dnmt3l* recruitment to the *Irf4* promoter, which resulted in increased DNA methylation in the *Irf4* promoter that led to reduced *Irf4* expression (fig. S6). This would have nullified a potential *Prdm1* upregulation brought about by increased p65 acetylation and p65-Ac recruitment to the *Prdm1* promoter, thereby leading to virtually unchanged *Prdm1* expression in B cells in which *Sirt1* was downregulated, deleted or Sirt1 metabolically inactivated.



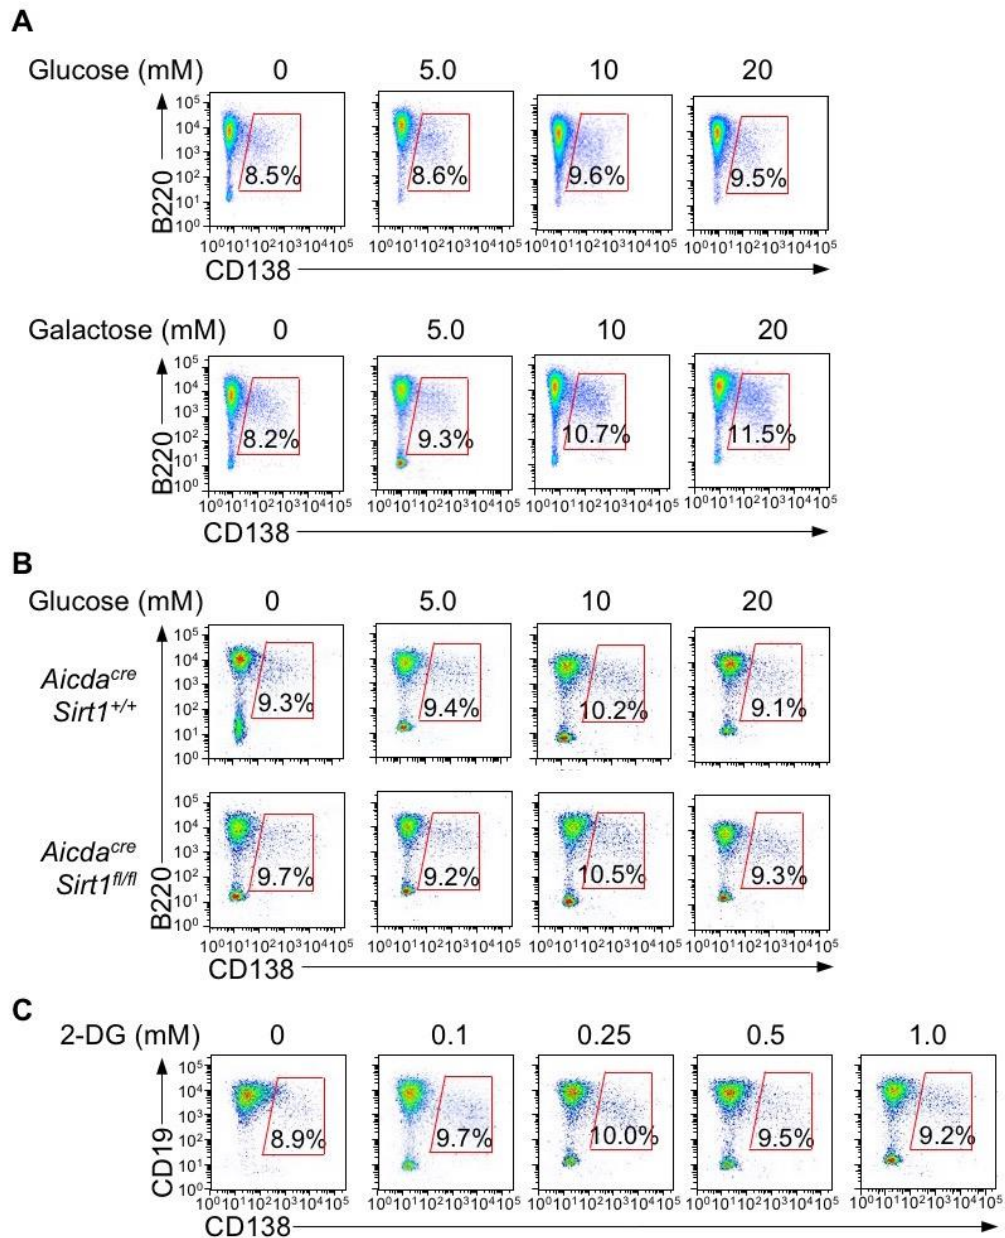

**Fig. S8. Plasma cell differentiation is not significantly altered by increased concentration of glucose.** (A) Murine C57BL/6 B cells were cultured in glucose-free medium supplied with 0 to 20 mM of glucose or galactose and stimulated with LPS plus IL-4 for 96 hours. Surface expression of B220 and CD138, as analyzed by flow cytometry. (B) *Aicda*<sup>cre</sup>*Sirt1*<sup>fl/fl</sup> and *Aicda*<sup>cre</sup>*Sirt1*<sup>+/+</sup> B cells were cultured in glucose-free medium supplied with 0 to 20 mM of glucose and stimulated with LPS plus IL-4 for 96 hours. (C) Surface expression of B220 and CD138 were analyzed by flow cytometry. Data are representative of three independent experiments yielding comparable results.

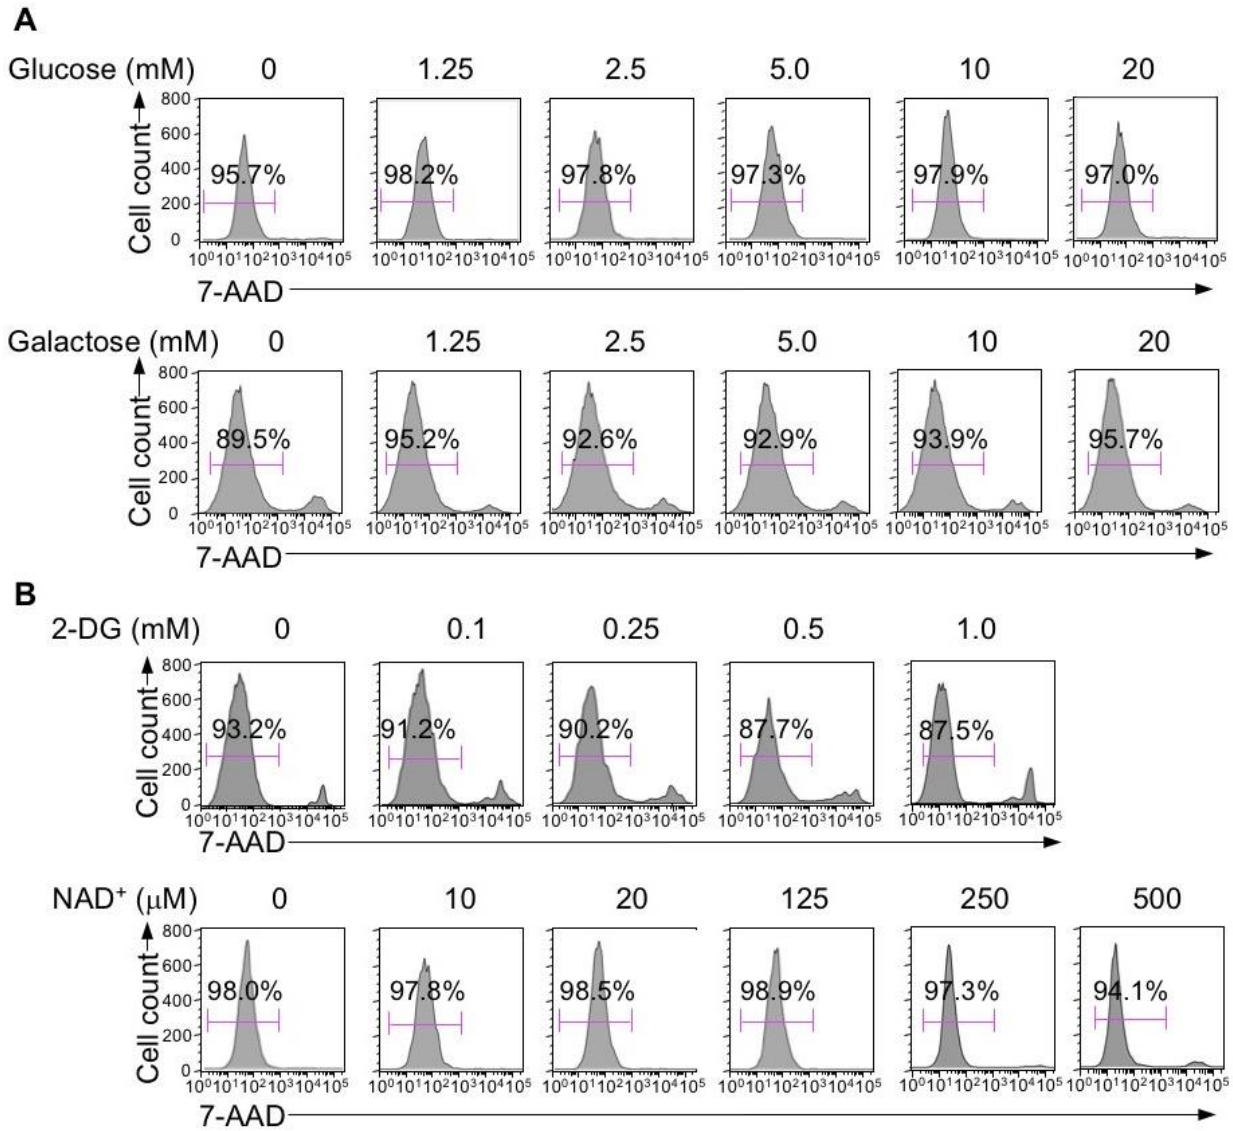

**Fig. S9. Impact of glucose, galactose, 2-Deoxyglucose (2-DG) and NAD<sup>+</sup> on B cell viability.** B cells were cultured in glucose-free medium supplied with increased concentration of glucose or galactose (**A**), or in complete RPMI-1640 medium in the presence of increased concentration of 2-DG or NAD<sup>+</sup> (**B**), and stimulated with LPS plus IL-4. Live (7AAD<sup>-</sup>) B cells were analyzed by flow cytometry after 96-hour culture. Data are representative of three independent experiments yielding comparable results.

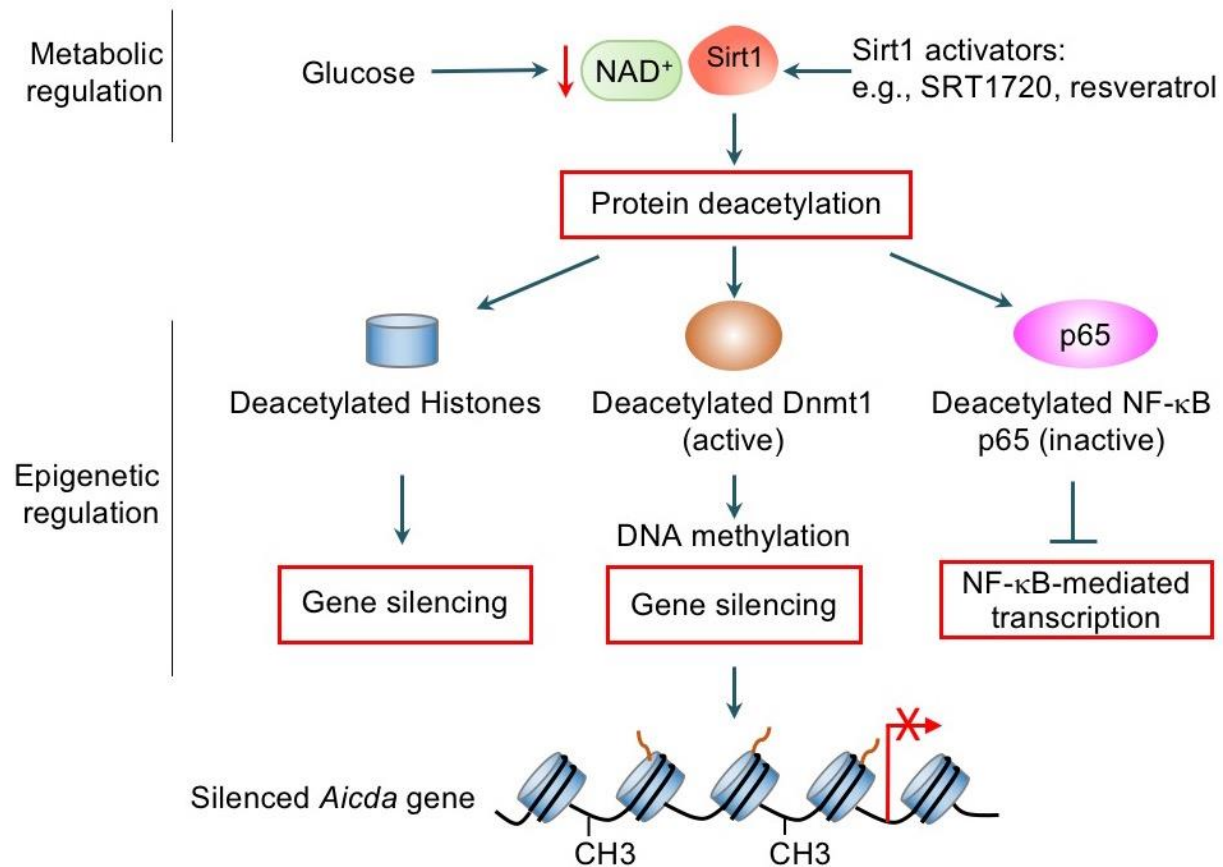

**Fig. S10. Three-prong Sirt1-mediated modulation of *Aicda* expression, through deacetylation of B cell histone and non-histone proteins.** By deacetylating histone and non-histone proteins, Sirt1 exerts a three-prong repression of *Aicda*: (i) By deacetylating histones in the *Aicda* promoter, Sirt1 directly represses *Aicda* expression; (ii) By deacetylating p65, Sirt1 reduces the activity of NF-κB, which is an important activator of the *Aicda* promoter; (iii) By deacetylating Dnmt1, Sirt1 enhances the DNA methylation activity of this methyltransferase, which leads to an increased DNA methylation of the *Aicda* promoter, thereby further repressing *Aicda* expression.

**Table S1A. Antibodies used for this study.**

| Antibody to                                  | Type       | Company          | Cat. No.<br>(mAb clone) | Assays         |
|----------------------------------------------|------------|------------------|-------------------------|----------------|
| Human/Mouse B220, PE-conjugated              | Rat mAb    | BioLegend        | 103208 (RA3-6B2)        | FCM            |
| Human/Mouse B220, Pacific Blue-conjugated    | Rat mAb    | BioLegend        | 103227 (RA3-6B2)        | FCM            |
| Mouse B220, FITC-conjugated                  | Rat mAb    | BioLegend        | 103206 (RA3-6B2)        | FCM            |
| Mouse CD19, Pacific Blue-conjugated          | Rat mAb    | BioLegend        | 115523 (6D5)            | FCM            |
| Mouse IgM, PE-conjugated                     | Rat mAb    | BioLegend        | 406508 (RMM-1)          | FCM, IF        |
| Mouse IgM, FITC-conjugated                   | Rat mAb    | BioLegend        | 406506 (RMM-1)          | FCM            |
| Mouse IgG1, FITC-conjugated                  | Rat mAb    | BD Biosciences   | 553443 (A85-1)          | FCM, ANA, IC   |
| Mouse IgG1, APC-conjugated                   | Rat mAb    | BD Biosciences   | 550874 (X56)            | FCM            |
| Mouse IgG2a, FITC-conjugated                 | Rat mAb    | BD Biosciences   | 553390 (R19-15)         | FCM, ANA, IC   |
| Mouse IgD, FITC-conjugated                   | Rat mAb    | BioLegend        | 405713 (11-26C.2a)      | FCM            |
| Mouse IgA, FITC-conjugated                   | Rat mAb    | BD Biosciences   | 559354 (C10-3)          | FCM            |
| Mouse CD138, PE-Cy7-conjugated               | Rat mAb    | BioLegend        | 142514 (281-2)          | FCM            |
| Mouse CD38                                   | Rat, mAb   | BioLegend        | 102718 (90)             | FCM            |
| Mouse CD3, biotin-conjugated                 | Rat mAb    | BioLegend        | 100244 (17A2)           | Cell isolation |
| Mouse CD3, FITC conjugated                   | Rat mAb    | BioLegend        | 100204 (17A2)           | FCM            |
| Human/Mouse Sirt1                            | Rabbit pAb | ABclonal         | A11267                  | FCM, IB, ChIP  |
| Mouse AID, FITC-conjugated                   | Rabbit pAb | Bioss            | bs-7855R-FITC           | FCM            |
| Mouse IgA, unconjugated                      | Rabbit mAb | Thermo Fisher    | PA-1-30826              | IF             |
| Rabbit-IgG (H+L), Alexa Fluor 488-conjugated | Goat pAb   | Cell Signaling   | 4412                    | IF             |
| Mouse IgE, FITC-conjugated                   | Rat mAb    | eBioscience      | 50-995-0 (23G3)         | FCM            |
| GL7, PE-conjugated                           | Rat mAb    | BioLegend        | 144607 (GL7)            | FCM, IF        |
| Human CD19, PE-conjugated                    | Mouse mAb  | BioLegend        | 302208 (HIB19)          | FCM            |
| Human IgG, allophycocyanin                   | Mouse mAb  | BD Biosciences   | 562025 (G18-145)        | FCM            |
| Human CD19, Biotin-conjugated                | Mouse mAb  | BioLegend        | 302204 (HIB19)          | Cell isolation |
| Mouse Ig, unconjugated                       | Goat pAb   | Southern Biotech | 1010-08                 | ELISA, ELISPOT |
| Mouse IgG, unconjugated                      | Goat pAb   | Southern Biotech | 1030-08                 | ELISA, ELISPOT |
| Mouse IgM, unconjugated                      | Goat pAb   | Southern Biotech | 1020-01                 | ELISA, ELISPOT |
| Mouse IgA, unconjugated                      | Goat pAb   | Southern Biotech | 1040-01                 | ELISA, ELISPOT |



|                                |            |                  |                  |                |
|--------------------------------|------------|------------------|------------------|----------------|
| Mouse IgM, biotin-conjugated   | Goat pAb   | Southern Biotech | 1022-08          | ELISA, ELISPOT |
| Mouse IgG1, biotin-conjugated  | Goat pAb   | Southern Biotech | 1070-08          | ELISA, ELISPOT |
| Mouse IgG2a, biotin-conjugated | Goat pAb   | Southern Biotech | 1080-08          | ELISA          |
| Mouse IgG2b, biotin-conjugated | Rat mAb    | BioLegend        | 406704 (RMG2b-1) | ELISA          |
| Mouse IgG3, biotin-conjugated  | Goat pAb   | Southern Biotech | 1100-08          | ELISA          |
| Mouse IgA, biotin-conjugated   | Goat pAb   | Southern Biotech | 1040-08          | ELISA          |
| Mouse AID                      | Mouse mAb  | Invitrogen       | 39-2500 (ZA001)  | IB             |
| acetyl-histone H3              | Rabbit Ab  | Millipore        | 17-615           | ChIP           |
| Mouse $\beta$ -Actin           | Mouse mAb  | Sigma            | A5441 (AC-15)    | IB             |
| NF-kB p65                      | Rabbit mAb | Cell Signaling   | 8242 (D14E12)    | IB             |
| Acetyl-NF-kB p65 (Lys310)      | Rabbit mAb | Cell Signaling   | (D2S3J)          | IB, ChIP       |
| Dnmt1                          | Rabbit pAb | Epigentek        | A-1700           | IB, ChIP       |
| Acetyl-Dnmt1                   | Rabbit pAb | ABclonal         | A11267           | IB             |

Abbreviations: mAb, monoclonal antibody; pAb, polyclonal antibody; ANA, anti-nuclear antibody analysis; ELISA, enzyme-linked immunosorbent assay; ELISPOT, enzyme-linked immunosorbent spot; FCM, flow cytometry; IB, immunoblotting; IC, immunocomplex analysis.

**Table S1B. Primers used for this study.**

|                                                   | Forward primer                                                | Reverse primer                                                     |
|---------------------------------------------------|---------------------------------------------------------------|--------------------------------------------------------------------|
| <u>Mouse genes</u>                                |                                                               |                                                                    |
| <i>Aicda</i>                                      | 5'-AGAAAGTCACGCTGGAGACC-3'                                    | 5'-CTCCTCTTCACCACGTAGCA-3'                                         |
| <i>Prdm1</i>                                      | 5'-GCTGCTGGGCTGCCTTTGGA-3'                                    | 5'-GGAGAGGAGGCCGTTCCCCA-3'                                         |
| <i>Sirt1</i>                                      | 5'-TGTCCTCTGTGGGATTCCTGA-3'                                   | 5'-CTTGAGGGTCTGGGAGGTCT-3'                                         |
| <i>Xbp1</i>                                       | 5'-AAGCCCGGATGAGCGAGCTG-3'                                    | 5'-ACCCGGCCACCAGCCTTACT-3'                                         |
| <i>Irf4</i>                                       | 5'-AAAGAGCTGACCACGACGAG-3'                                    | 5'-AAAGCCCATCTGGAGCCATC-3'                                         |
| <i>Dnmt1</i>                                      | 5'-GTGTCCTAACTTGGCGGTGA-3'                                    | 5'-TCTTCATAGGCTGCCCAAGC-3'                                         |
| <i>Dnmt3a</i>                                     | 5'-AATAGAGACCTCGGAGGCAG-3'                                    | 5'-GTGTCTGGTGTGGTGTCTCT-3'                                         |
| <i>Dnmt3b</i>                                     | 5'-CCTGGAGAGTCACTGGAGGA-3'                                    | 5'-TGGTTGTGCGTCTTCGACTT-3'                                         |
| <i>Dnmt3l</i>                                     | 5'-TGCGGGTACTGAGCCTTTTT-3'                                    | 5'-ACGTACTTCAGCGTTCCTCC-3'                                         |
| <i>β-Actin</i>                                    | 5'-CTAAGGCCAACCGTGAAAG-3'                                     | 5'-ACCAGAGGCATACAGGGACA-3'                                         |
| <i>Gapdh</i>                                      | 5'-TTCACCACCATGGAGAAGGC-3'                                    | 5'-GGCATGGACTGTGGTCATGA-3'                                         |
| <u>Human genes</u>                                |                                                               |                                                                    |
| <i>SIRT1</i>                                      | 5'-ACAGGTTGCGGGAATCCAAA-3'                                    | 5'-GTTTCATCAGCTGGGCACCTA-3'                                        |
| <i>β-ACTIN</i>                                    | 5'-AGAGCTACGAGCTGCCTGAC-3'                                    | 5'-AGCACTGTGTTGGCGTACAG-3'                                         |
| <u>Germline transcripts</u>                       |                                                               |                                                                    |
| I $\mu$ -C $\mu$                                  | 5'-ACCTGGGAATGTATGGTTGTGGCTT-3'                               | 5'-GCAGGCAGGGCTAGATATGG-3'                                         |
| I $\gamma$ 1-C $\gamma$ 1                         | 5'-TCGAGAAGCCTGAGGAATGTG-3'                                   | 5'-ATGGAGTTAGTTTGGGCAGCA-3'                                        |
| I $\gamma$ 3-C $\gamma$ 3                         | 5'-AACTACTGCTACCACCACCACAG-3'                                 | 5'-AGCCAGGGACCAAGGGATAGAC-3'                                       |
| I $\gamma$ 2b-C $\gamma$ 2b                       | 5'-GATGGGGAGGAGTTGGCAGAT-3'                                   | 5'-CGGAGGAACCAGTTGTATC-3'                                          |
| I $\alpha$ -C $\alpha$                            | 5'-GCTTCCTGGAAGCAGCAAC-3'                                     | 5'-TAATCGTGAATCAGGCAG-3'                                           |
| I $\epsilon$ -C $\epsilon$                        | 5'-CCCCACTTTTAGCTGAGGGC-3'                                    | 5'-ACAGGGCTTCAAGGGGTAGA-3'                                         |
| <u>Post-recombination transcripts</u>             |                                                               |                                                                    |
| I $\mu$ -C $\gamma$ 1                             | 5'-ACCTGGGAATGTATGGTTGTGGCTT-3'                               | 5'-ATGGAGTTAGTTTGGGCAGCA-3'                                        |
| I $\mu$ -C $\gamma$ 3                             | 5'-ACCTGGGAATGTATGGTTGTGGCTT-3'                               | 5'-AGCCAGGGACCAAGGGATAGAC-3'                                       |
| I $\mu$ -C $\gamma$ 2b                            | 5'-ACCTGGGAATGTATGGTTGTGGCTT-3'                               | 5'-CGGAGGAACCAGTTGTATC-3'                                          |
| I $\mu$ -C $\alpha$                               | 5'-ACCTGGGAATGTATGGTTGTGGCTT-3'                               | 5'-TAATCGTGAATCAGGCAG-3'                                           |
| I $\mu$ -C $\epsilon$                             | 5'-ACCTGGGAATGTATGGTTGTGGCTT-3'                               | 5'-ACAGGGCTTCAAGGGGTAGA-3'                                         |
| <u>Somatic mutations</u>                          |                                                               |                                                                    |
| V <sub>186.2</sub> DJ <sub>H</sub> -C $\gamma$ 1  | 5'-TCGTCGGCAGCGTCAGATGTGTATAAG<br>GACAGCAGGTCCAAGTGCAGCAG-3'  | 5'-GTCTCGTGGGCTCGGAGATGTGTATAAG<br>AGACAGTGTCTAGCTTGGATCTCTGC-3'   |
| V <sub>186.2</sub> DJ <sub>H</sub> -C $\gamma$ 3  | 5'-TCGTCGGCAGCGTCAGATGTGTATAAG<br>AGACAGCAGGTCCAAGTGCAGCAG-3' | 5'-GTCTCGTGGGCTCGGAGATGTGTATAAG<br>AGACAGACCAAGGGATAGACAGATGGGG-3' |
| V <sub>186.2</sub> DJ <sub>H</sub> -C $\gamma$ 2b | 5'-TCGTCGGCAGCGTCAGATGTGTATAAG<br>AGACAGCAGGTCCAAGTGCAGCAG-3' | 5'-GTCTCGTGGGCTCGGAGATGTGTATAAG<br>AGACAGCGGAGGAACCAGTTGTATC-3'    |
| <u>ChIP and MeDIP</u>                             |                                                               |                                                                    |
| <i>Aicda</i> promoter                             | 5'-GGAGGCAGATGTTGGATACC-3'                                    | 5'-ATATCGGTCTCCAGCGTGAC-3'                                         |
| <i>Prdm1</i> promoter                             | 5'-ACTCCAGGACTACACAGCGA-3'                                    | 5'-GGATCGCTAGCTTCCCTGTGC-3'                                        |
| <i>Prdm1</i> intron                               | 5'-CTCTGACTCTGGTCTGAAGT-3'                                    | 5'-GTCTCCTGCTTCGTGTTATC-3'                                         |
| <i>Xbp1</i> promoter                              | 5'-CCTAAGCCGGATATGCCACC-3'                                    | 5'-CCCCATTTTAATGTCCGGCG-3'                                         |
| <i>Irf4</i> promoter                              | 5'-CTCTGACAATGGAAAATAATTG-3'                                  | 5'-GAAAAGTGGTGCAGAGATGC-3'                                         |
| <u>Bisulfite PCR</u>                              |                                                               |                                                                    |
| <i>Aicda</i> promoter                             | 5'-TGATTTTTGTTATTTGTGGTATTTG-3'                               | 5'-TACTCTTATAAACTCCTCCCCAC-3'                                      |

|                             |                                                                      |                                                                        |
|-----------------------------|----------------------------------------------------------------------|------------------------------------------------------------------------|
| <i>Prdm1</i><br>promoter    | 5'-TGTTGAAGGTAAAAGATTATTGAAGG-3'                                     | 5'-ATTATCCCTACCTCTCATACCCAAA-3'                                        |
| <i>Prdm1</i> reg.<br>region | 5'-GGGATATGGTGTGTTATTTTGATTGA-3'                                     | 5'-TCCAAAATAACCTAAATTCCTCA-3'                                          |
| <i>Xbp1</i> promoter        | 5'-TGTAGTTTAGGTTGTTTTAAATTGG-3'                                      | 5'-TTTAATTTTTGTTGTATTGGGAAGTG-3'                                       |
| <u>Bisulfite-Seq</u>        |                                                                      |                                                                        |
| <i>Aicda</i> promoter       | 5'-TCGTCGGCAGCGTCAGATGTGTATAAGAG<br>ACAGTGATTTTTGTTATTTGTGGTATTTG-3' | 5'-GTCTCGTGGGCTCGGAGATGTGTATAAGA<br>GACAGTACTCTTATAAACTCCTCCCCAC-3'    |
| <i>Prdm1</i><br>promoter    | 5'-TCGTCGGCAGCGTCAGATGTGTATAAGAG<br>ACAGTTTTTTGAGGAGGAGTTTTTATTT-3'  | 5'-GTCTCGTGGGCTCGGAGATGTGTATAAGAG<br>ACAGAAATCTTCTTACTTCCCTTTACAAAC-3' |
| <i>Prdm1</i> reg.<br>region | [TCGTCGGCAGCGTCAGATGTGTATAAG<br>AGACAG]GGGATATGGTGTGTTATTTTGATTGA    | 5'-GTCTCGTGGGCTCGGAGATGTGTATAAGAG<br>ACAGTCCAAAATAACCTAAATTCCTCA-3'    |
| <i>Xbp1</i> promoter        | 5'-TCGTCGGCAGCGTCAGATGTGTATAAGAG<br>ACAGTGATTTTAGGTTGTTTTAAATTGG-3'  | 5'-GTCTCGTGGGCTCGGAGATGTGTATAAGAG<br>ACAGTTAATTTTTGTTGTATTGGGAAGTG-3'  |

---
